# Supplementary material for: Two-stage one-pot synthetic strategy for the key triazone-triazole intermediate of ensitrelvir (S-217622), an oral clinical candidate for treating COVID-19
Source: Royal Society of Chemistry journal article supplement (doi:10.1039/d2ra06841a), 2022-01-01

## Electronic Supplementary Information

for

### Two-stage one-pot synthetic strategy for the key triazone-triazole intermediate of ensitrelvir (S-217622), an oral clinical candidate for treating COVID-19

Wei Hu,<sup>a</sup> Xiang Zhang,<sup>a</sup> Yuanchang Liu,<sup>a</sup> Teng Liu,<sup>a</sup> Jiale Wen,<sup>a</sup> Xiaopeng Peng,<sup>a,b</sup> Xin

Xie,<sup>\*a,b</sup> Weiming Chen<sup>\*a,b</sup>

<sup>a</sup> School of Pharmaceutical Sciences; <sup>b</sup> Key Laboratory of Prevention and Treatment of  
Cardiovascular and Cerebrovascular Disease, Ministry of Education,  
Gannan Medical University, Ganzhou 341000, Jiangxi, China.

#### EXPERIMENTAL

|                                                                                           |    |
|-------------------------------------------------------------------------------------------|----|
| HPLC methods for compound <b>2</b> , <b>4</b> , <b>8</b> , <b>9</b> , and <b>10</b> ..... | S3 |
| Trials of preparation <b>3</b> from <b>7</b> .....                                        | S6 |

#### SPECTROSCOPIC DATA

|                                                                           |     |
|---------------------------------------------------------------------------|-----|
| <sup>1</sup> H NMR and <sup>13</sup> C NMR of compound <b>3</b> .....     | S7  |
| <sup>1</sup> H NMR and <sup>13</sup> C NMR of compound <b>3a</b> .....    | S8  |
| <sup>1</sup> H NMR and <sup>13</sup> C NMR of compound <b>7</b> .....     | S9  |
| <sup>1</sup> H NMR and <sup>13</sup> C NMR of compound <b>7·HCl</b> ..... | S10 |
| <sup>1</sup> H NMR and <sup>13</sup> C NMR of compound <b>2</b> .....     | S11 |
| <sup>1</sup> H NMR and <sup>13</sup> C NMR of compound <b>8</b> .....     | S12 |
| <sup>1</sup> H NMR and <sup>13</sup> C NMR of compound <b>4</b> .....     | S13 |
| <sup>1</sup> H NMR and <sup>13</sup> C NMR of compound <b>9</b> .....     | S14 |
| <sup>1</sup> H NMR and <sup>13</sup> C NMR of compound <b>10</b> .....    | S15 |
| HRMS of compound <b>7</b> .....                                           | S16 |
| HRMS of compound <b>3</b> .....                                           | S16 |
| HRMS of compound <b>3a</b> .....                                          | S17 |
| HRMS of compound <b>2</b> .....                                           | S17 |
| HRMS of compound <b>8</b> .....                                           | S18 |

|                                  |            |
|----------------------------------|------------|
| HRMS of compound <b>4</b> .....  | <b>S18</b> |
| HRMS of compound <b>9</b> .....  | <b>S19</b> |
| HRMS of compound <b>10</b> ..... | <b>S19</b> |
| DSC of compound <b>7</b> .....   | <b>S20</b> |
| DSC of compound <b>3</b> .....   | <b>S20</b> |
| DSC of compound <b>8</b> .....   | <b>S21</b> |
| DSC of compound <b>4</b> .....   | <b>S21</b> |

## HPLC methods for compound 2,4, 8, 9 and 10

a) Sample preparation: about 0.100 mg/mL for compound 2, 4, 8, and 9; about 0.127 mg/mL for compound 10. The solution was filtered and performed HPLC test as following method.

b) HPLC method:

Equipment: Waters e2695 Separation Module

Column: Inertsustain™ 5 μm, 4.6×250 mm

Mobile phase: 50% acetonitrile in water

Dilute: 50% acetonitrile in water

Flow: 1 mL/min

Wavelength: 254 nm

Column Temp: 25°C

Volume: 10 μL

Time: 20 min

c) Data Treatment

RRT: 7.419 min for compound 2; 7.100 min for compound 4; 5.488 min for compound 8;  
7.701 min for compound 9; 12.711 min for compound 10

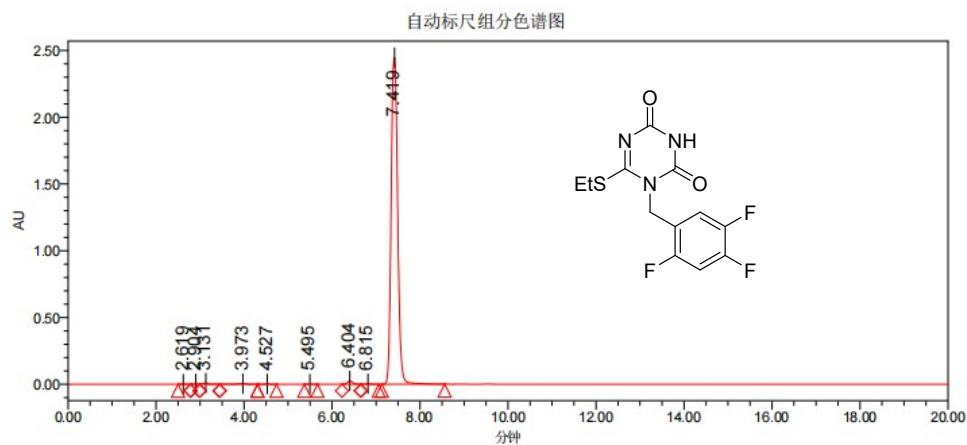

处理通道说明: 2998 Ch1 254 纳米@4.8 纳米

|   | 处理通道说明                 | 保留时间<br>(分钟) | 面积<br>(微伏秒) | % 面积  | 高度<br>(微伏) |
|---|------------------------|--------------|-------------|-------|------------|
| 1 | 2998 Ch1 254 纳米@4.8 纳米 | 2.619        | 11767       | 0.05  | 1778       |
| 2 | 2998 Ch1 254 纳米@4.8 纳米 | 2.904        | 16468       | 0.06  | 2916       |
| 3 | 2998 Ch1 254 纳米@4.8 纳米 | 3.131        | 92162       | 0.36  | 10497      |
| 4 | 2998 Ch1 254 纳米@4.8 纳米 | 3.973        | 96741       | 0.38  | 5529       |
| 5 | 2998 Ch1 254 纳米@4.8 纳米 | 4.527        | 21840       | 0.09  | 3160       |
| 6 | 2998 Ch1 254 纳米@4.8 纳米 | 5.495        | 11823       | 0.05  | 1771       |
| 7 | 2998 Ch1 254 纳米@4.8 纳米 | 6.404        | 205155      | 0.80  | 25593      |
| 8 | 2998 Ch1 254 纳米@4.8 纳米 | 6.815        | 39992       | 0.16  | 4524       |
| 9 | 2998 Ch1 254 纳米@4.8 纳米 | 7.419        | 25002679    | 98.06 | 2444715    |

自动标尺组分色谱图

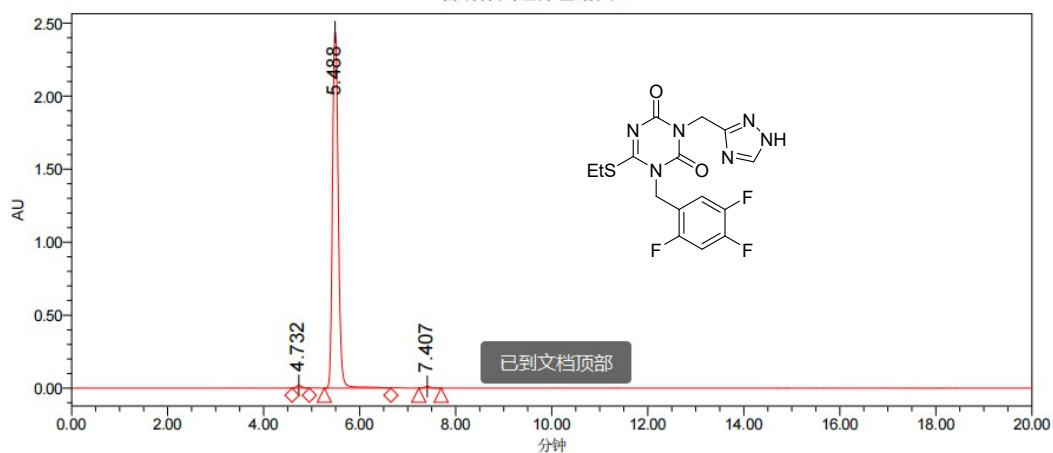

处理通道说明: 2998 Ch1 254 纳米@4.8 纳米

|   | 处理通道说明                 | 保留时间<br>(分钟) | 面积<br>(微伏秒) | % 面积  | 高度<br>(微伏) |
|---|------------------------|--------------|-------------|-------|------------|
| 1 | 2998 Ch1 254 纳米@4.8 纳米 | 4.732        | 149710      | 0.72  | 18011      |
| 2 | 2998 Ch1 254 纳米@4.8 纳米 | 5.488        | 20642832    | 98.79 | 2441243    |
| 3 | 2998 Ch1 254 纳米@4.8 纳米 | 7.407        | 103461      | 0.50  | 11575      |

自动标尺组分色谱图

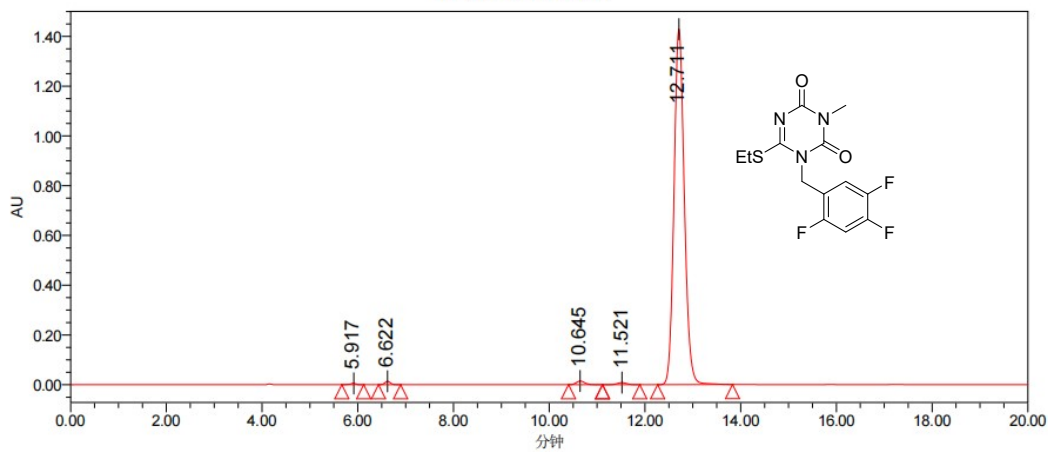

处理通道说明: 2998 Ch1 254 纳米@4.8 纳米

|   | 处理通道说明                 | 保留时间<br>(分钟) | 面积<br>(微伏秒) | % 面积  | 高度<br>(微伏) |
|---|------------------------|--------------|-------------|-------|------------|
| 1 | 2998 Ch1 254 纳米@4.8 纳米 | 5.917        | 46878       | 0.21  | 5359       |
| 2 | 2998 Ch1 254 纳米@4.8 纳米 | 6.622        | 108834      | 0.50  | 13360      |
| 3 | 2998 Ch1 254 纳米@4.8 纳米 | 10.645       | 182641      | 0.84  | 14635      |
| 4 | 2998 Ch1 254 纳米@4.8 纳米 | 11.521       | 115516      | 0.53  | 8437       |
| 5 | 2998 Ch1 254 纳米@4.8 纳米 | 12.711       | 21357171    | 97.92 | 1428295    |

自动标尺组分色谱图

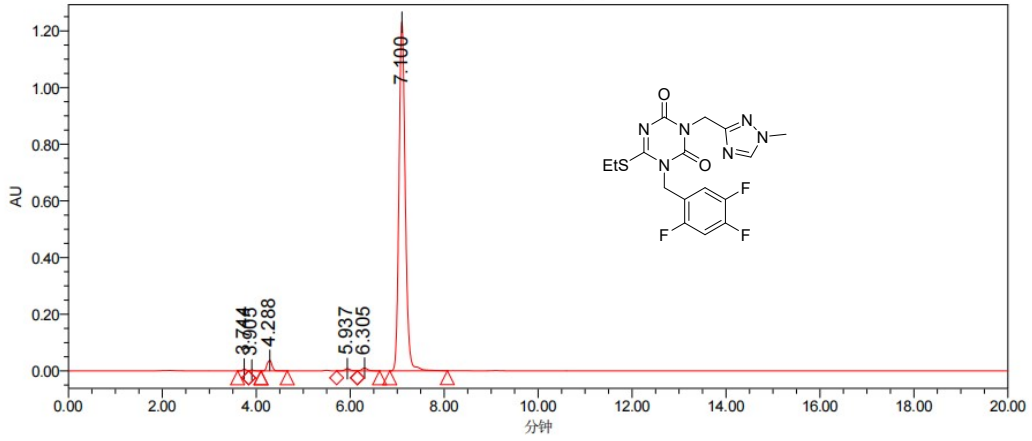

处理通道说明: 2998 Ch1 254 纳米@4.8 纳米

|   | 处理通道说明                 | 保留时间 (分钟) | 面积 (微伏秒) | % 面积  | 高度 (微伏) |
|---|------------------------|-----------|----------|-------|---------|
| 1 | 2998 Ch1 254 纳米@4.8 纳米 | 3.744     | 33507    | 0.28  | 6211    |
| 2 | 2998 Ch1 254 纳米@4.8 纳米 | 3.905     | 18630    | 0.16  | 3120    |
| 3 | 2998 Ch1 254 纳米@4.8 纳米 | 4.288     | 273643   | 2.29  | 37101   |
| 4 | 2998 Ch1 254 纳米@4.8 纳米 | 5.937     | 68231    | 0.57  | 7649    |
| 5 | 2998 Ch1 254 纳米@4.8 纳米 | 6.305     | 87704    | 0.74  | 9929    |
| 6 | 2998 Ch1 254 纳米@4.8 纳米 | 7.100     | 11442119 | 95.96 | 1230699 |

自动标尺组分色谱图

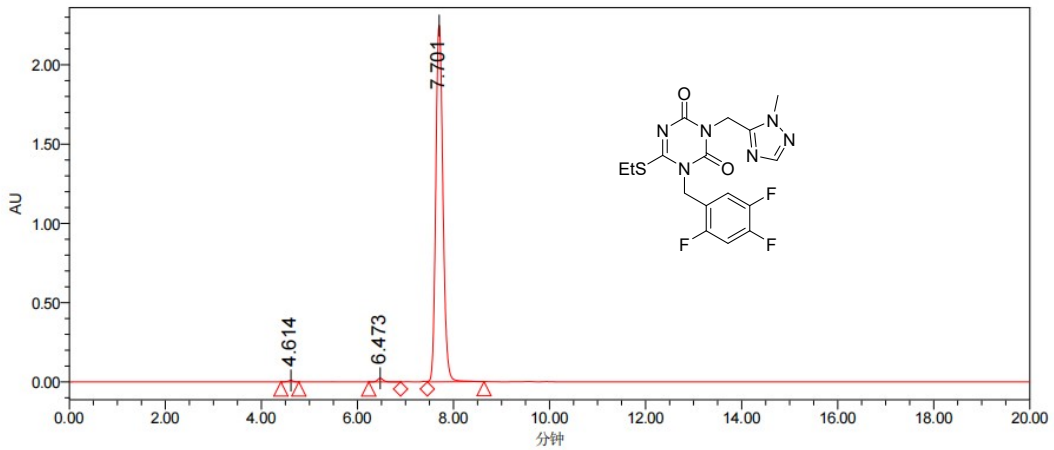

处理通道说明: 2998 Ch1 254 纳米@4.8 纳米

|   | 处理通道说明                 | 保留时间 (分钟) | 面积 (微伏秒) | % 面积  | 高度 (微伏) |
|---|------------------------|-----------|----------|-------|---------|
| 1 | 2998 Ch1 254 纳米@4.8 纳米 | 4.614     | 72660    | 0.31  | 9074    |
| 2 | 2998 Ch1 254 纳米@4.8 纳米 | 6.473     | 197562   | 0.84  | 23153   |
| 3 | 2998 Ch1 254 纳米@4.8 纳米 | 7.701     | 23293388 | 98.85 | 2246756 |

***Trials of preparation 3 from 7***

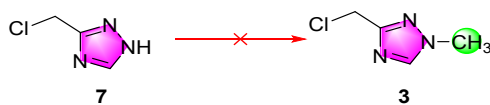

| Entry | Reagents and conditions <sup>a</sup>                                                               | Yield <sup>b</sup> |
|-------|----------------------------------------------------------------------------------------------------|--------------------|
| 1     | TEA (1.2 equiv.), MeI (1.1 equiv.), DCM                                                            | No product         |
| 2     | K <sub>2</sub> CO <sub>3</sub> (2.2 equiv.), MeI (1.1 equiv.), DMF                                 | No product         |
| 3     | K <sub>2</sub> CO <sub>3</sub> (2.2 equiv.), MeI (1.1 equiv.), ACN                                 | No product         |
| 4     | K <sub>2</sub> CO <sub>3</sub> (2.2 equiv.), MeI (1.1 equiv.), Acetone                             | No product         |
| 5     | K <sub>2</sub> CO <sub>3</sub> (2.2 equiv.), Me <sub>2</sub> SO <sub>4</sub> (1.1 equiv.), Acetone | No product         |
| 6     | Ph <sub>3</sub> P (1.1 equiv.), DIAD (1.1 equiv.), CH <sub>3</sub> OH                              | No product         |
| 7     | Me <sub>3</sub> O <sup>+</sup> BF <sub>4</sub> <sup>-</sup> (1.1 equiv.), EA                       | No product         |

Notes: <sup>a</sup> 100 mg of base **7** was used for reaction. <sup>b</sup> By TLC.

## SPECTROSCOPIC DATA

$^1\text{H}$  NMR (400 MHz) and  $^{13}\text{C}$  NMR (100 MHz) in  $\text{DMSO-}d_6$  of compound **3**

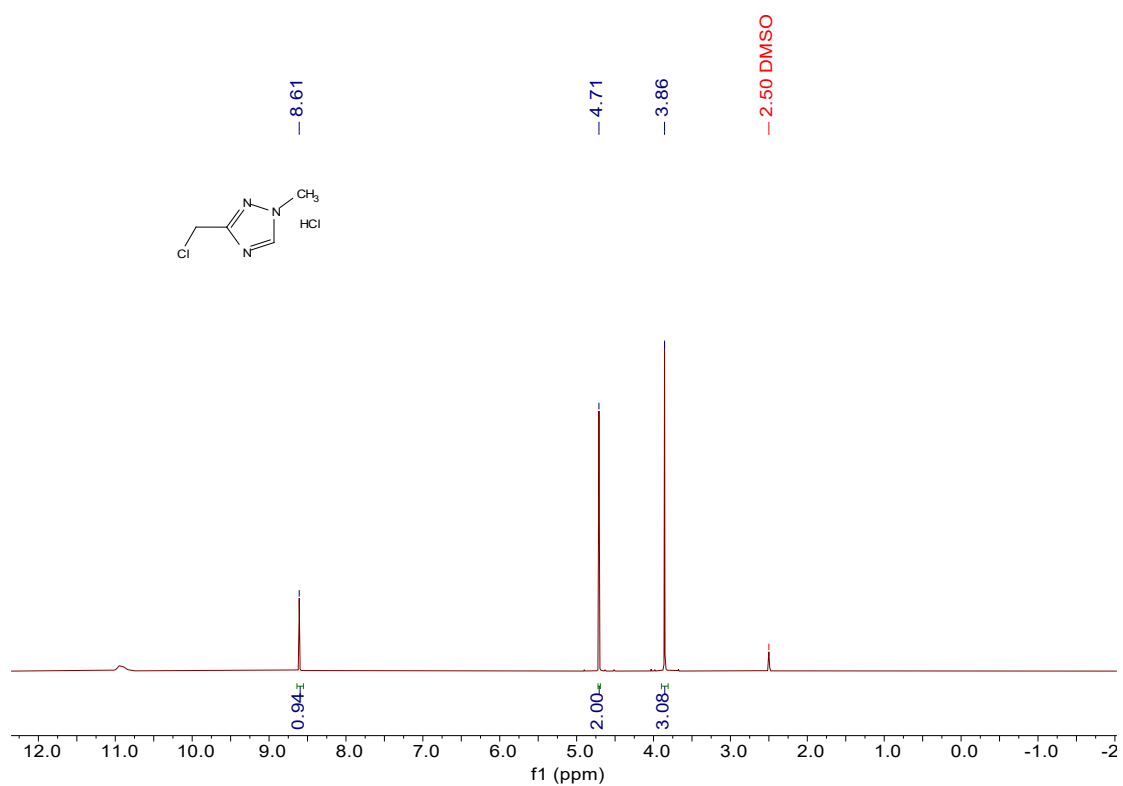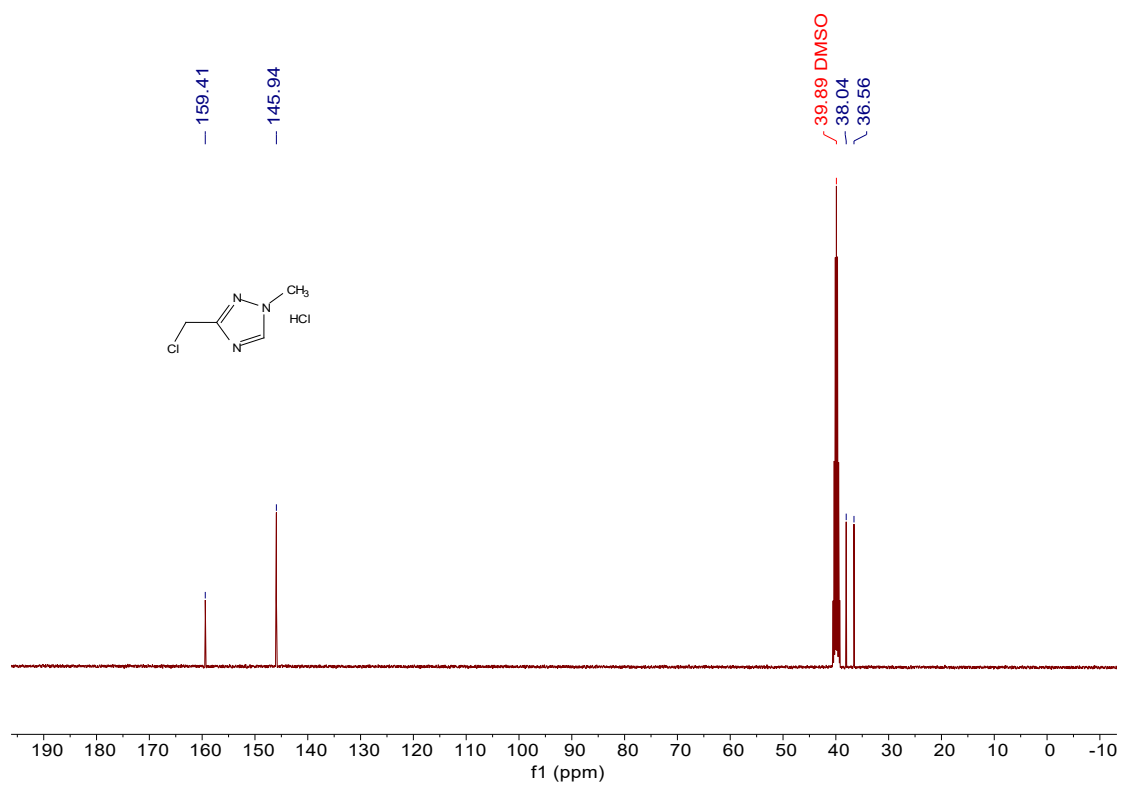

$^1\text{H}$  NMR (400 MHz) and  $^{13}\text{C}$  NMR (100 MHz) in  $\text{DMSO-}d_6$  of compound **3a**

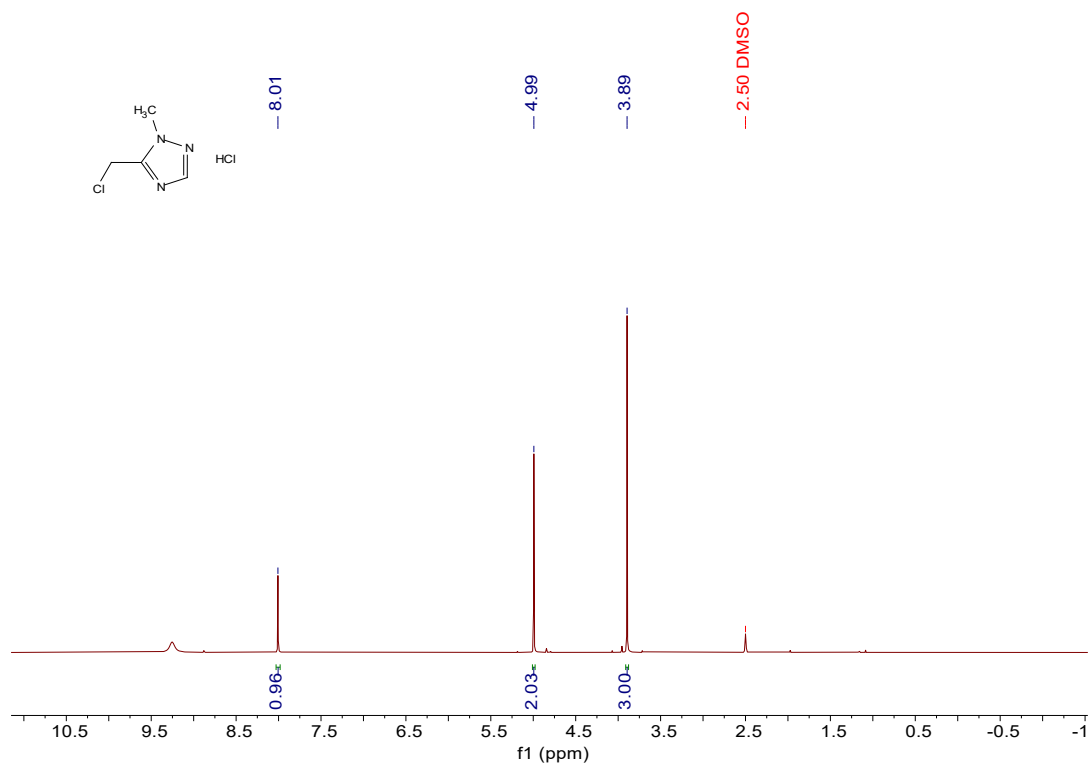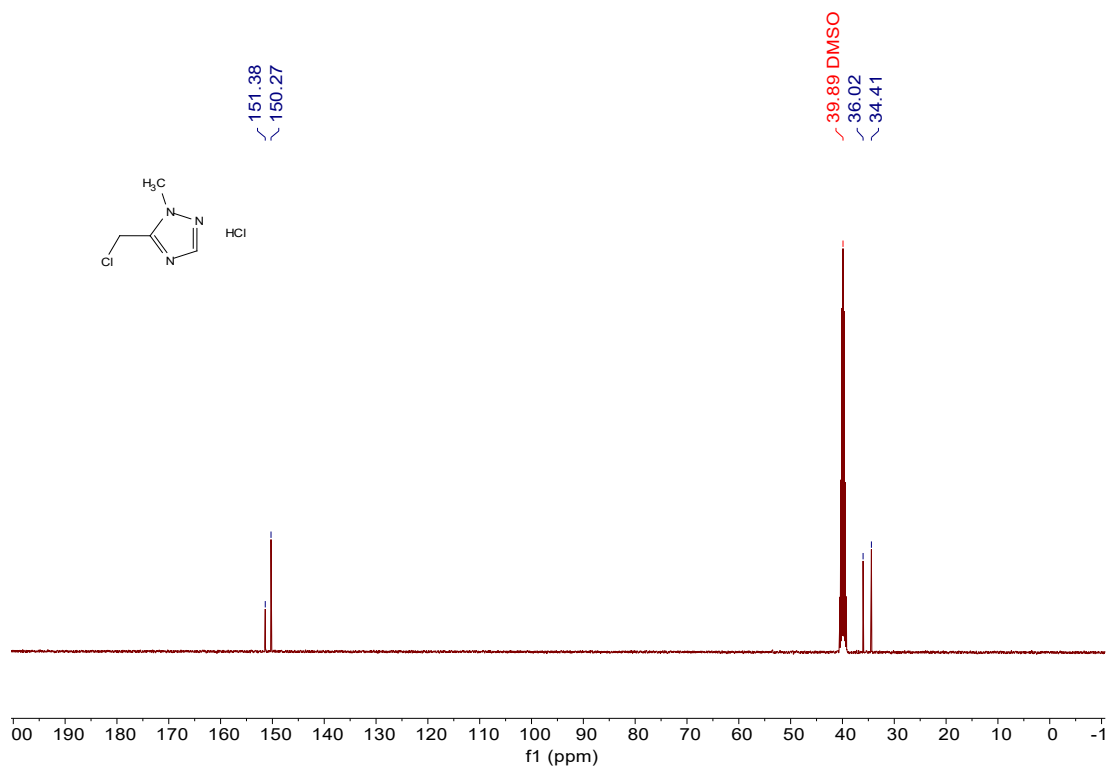



$^1\text{H}$  NMR (400 MHz) and  $^{13}\text{C}$  NMR (100 MHz) in  $\text{DMSO-}d_6$  of compound 7

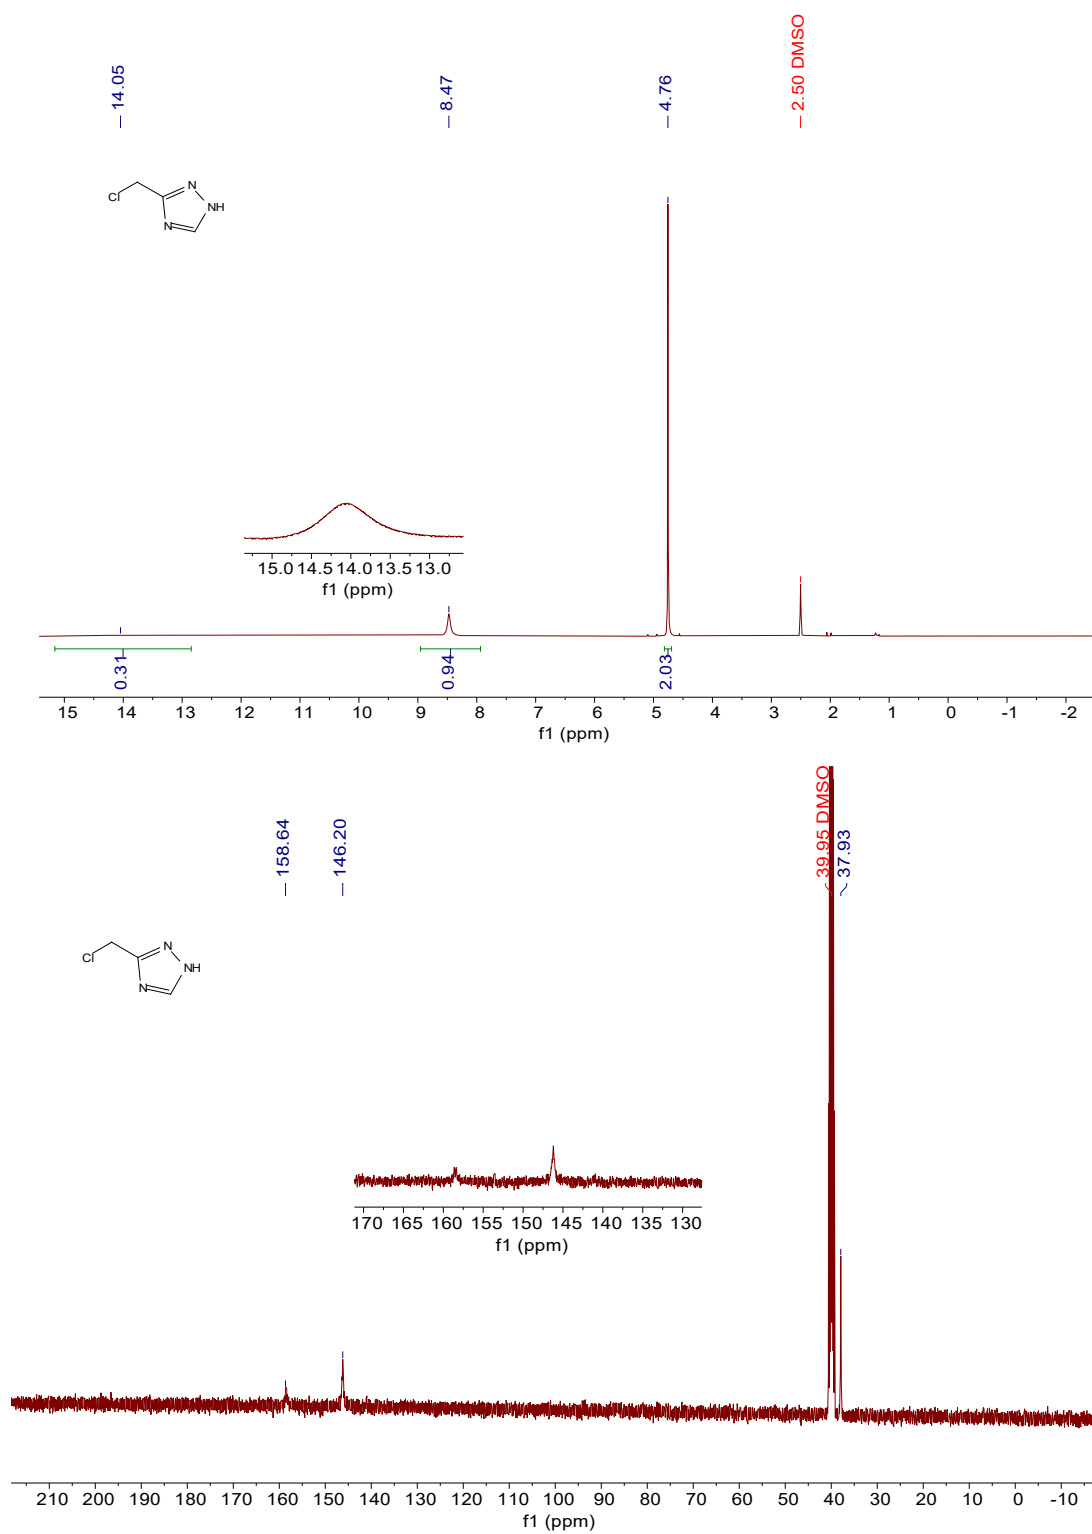

$^1\text{H}$  NMR (400 MHz) and  $^{13}\text{C}$  NMR (100 MHz) in  $\text{DMSO-}d_6$  of compound **7·HCl**

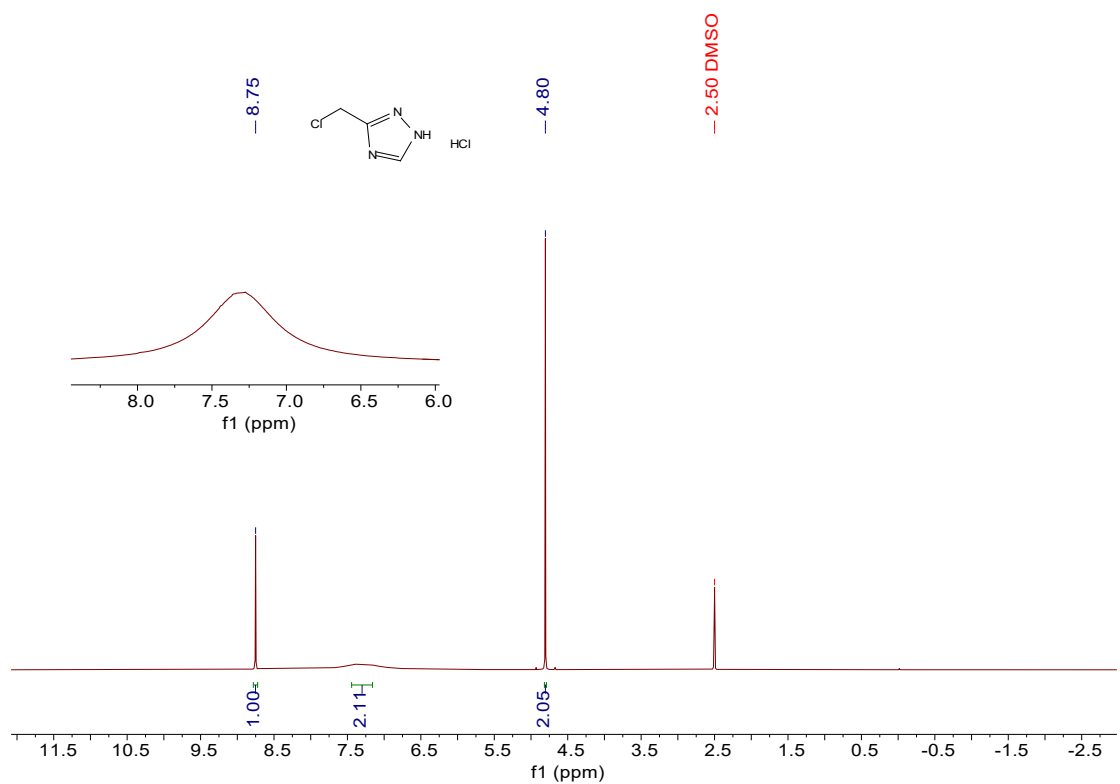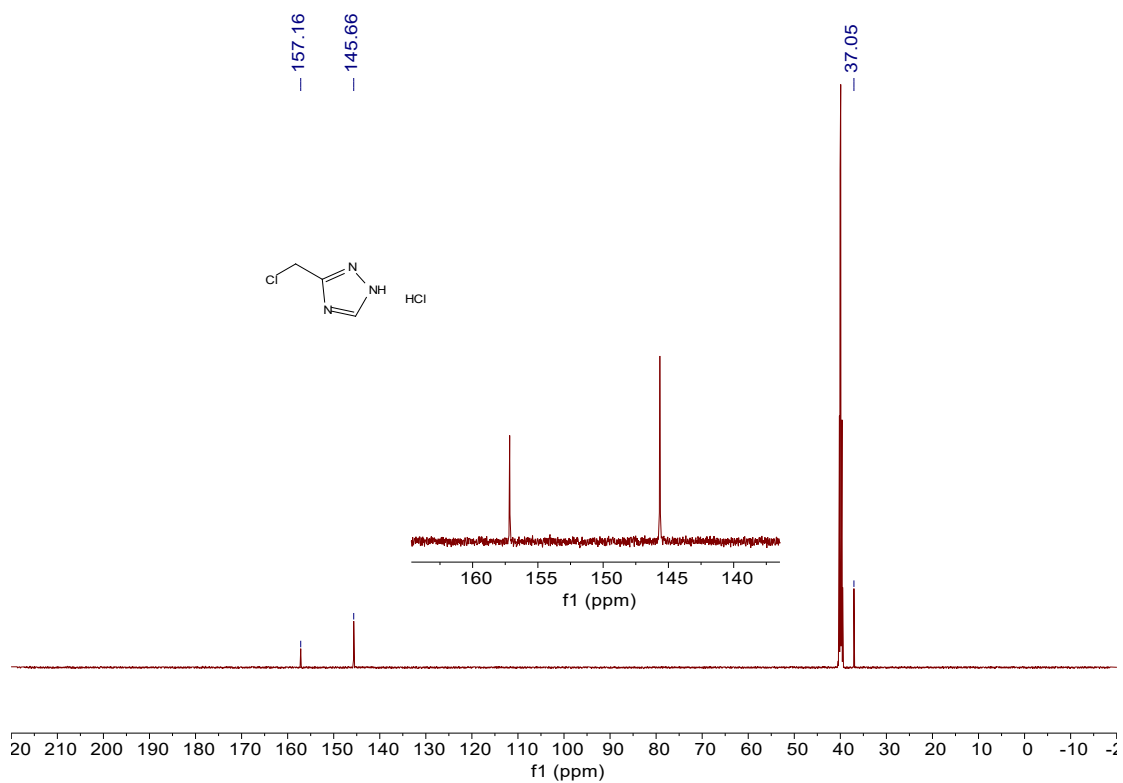

$^1\text{H}$  NMR (400 MHz) in  $\text{CDCl}_3$  and  $^{13}\text{C}$  NMR (100 MHz) in  $\text{DMSO}-d_6$  of compound **2**

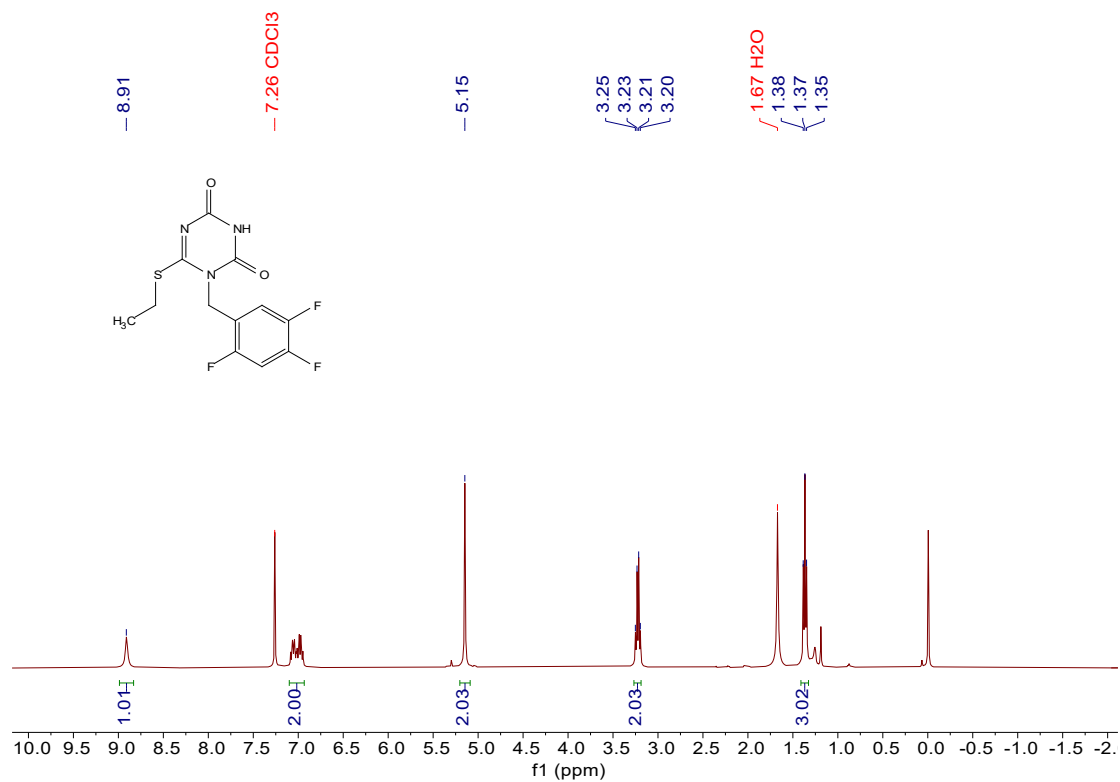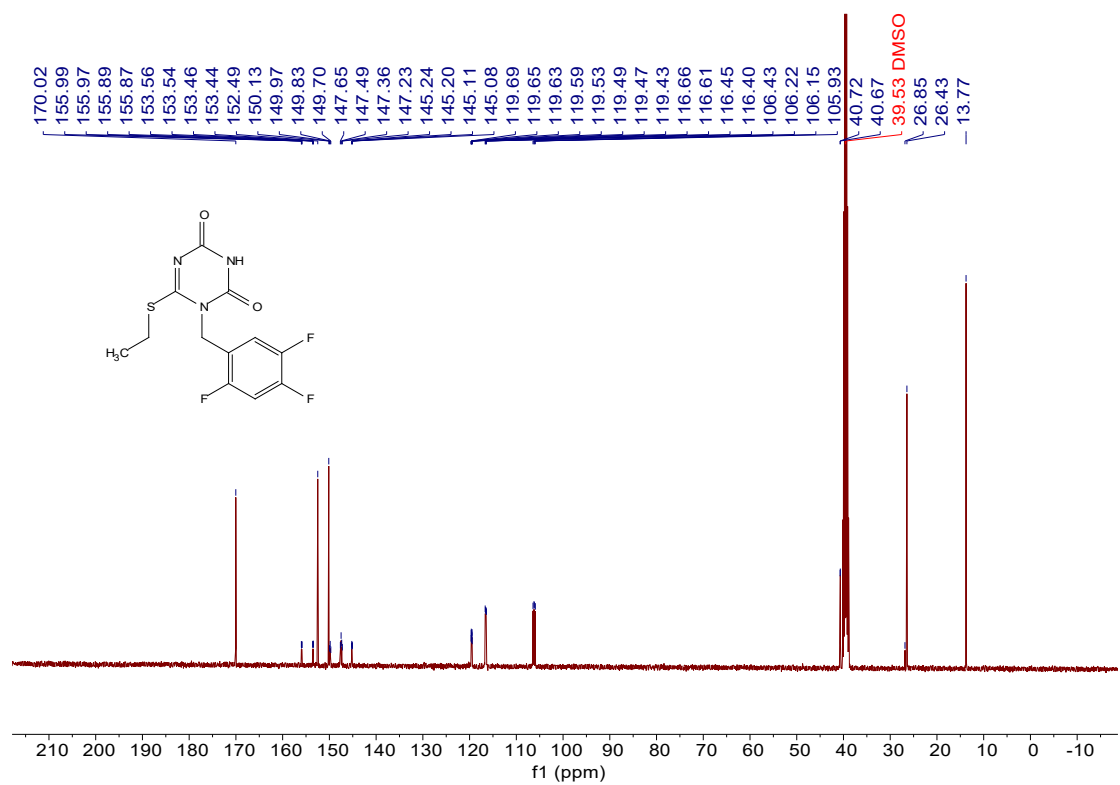

$^1\text{H}$  NMR (400 MHz) and  $^{13}\text{C}$  NMR (100 MHz) in  $\text{DMSO-}d_6$  of compound **8**

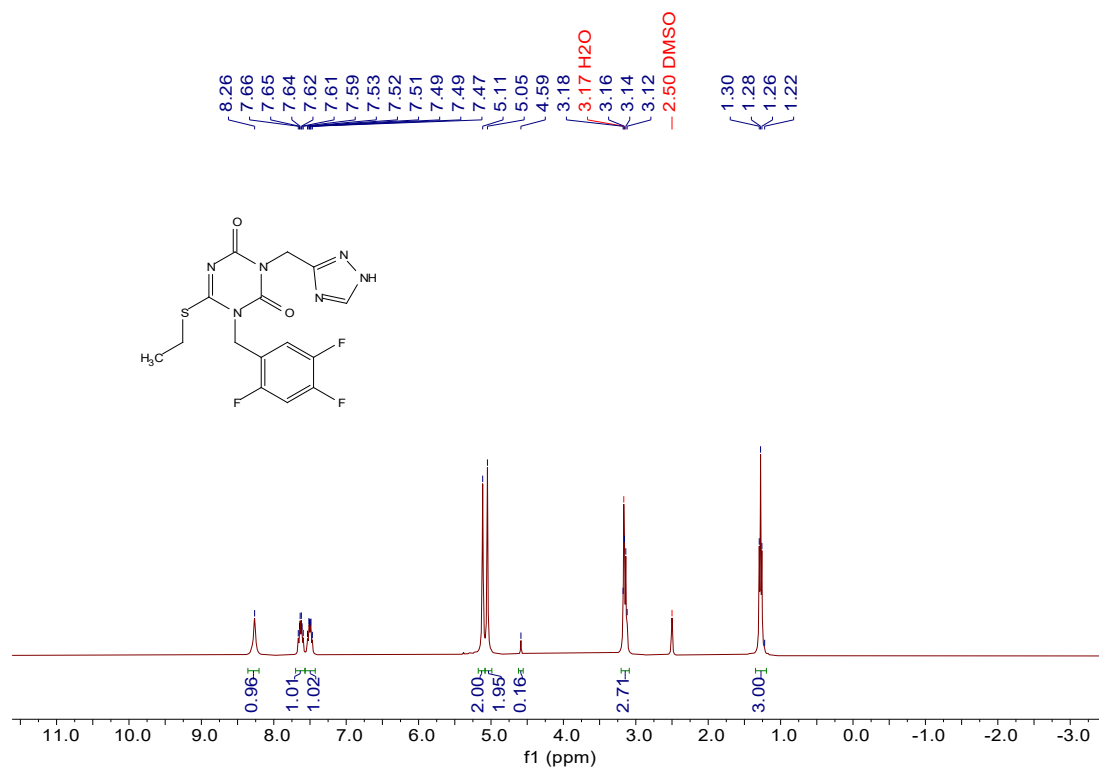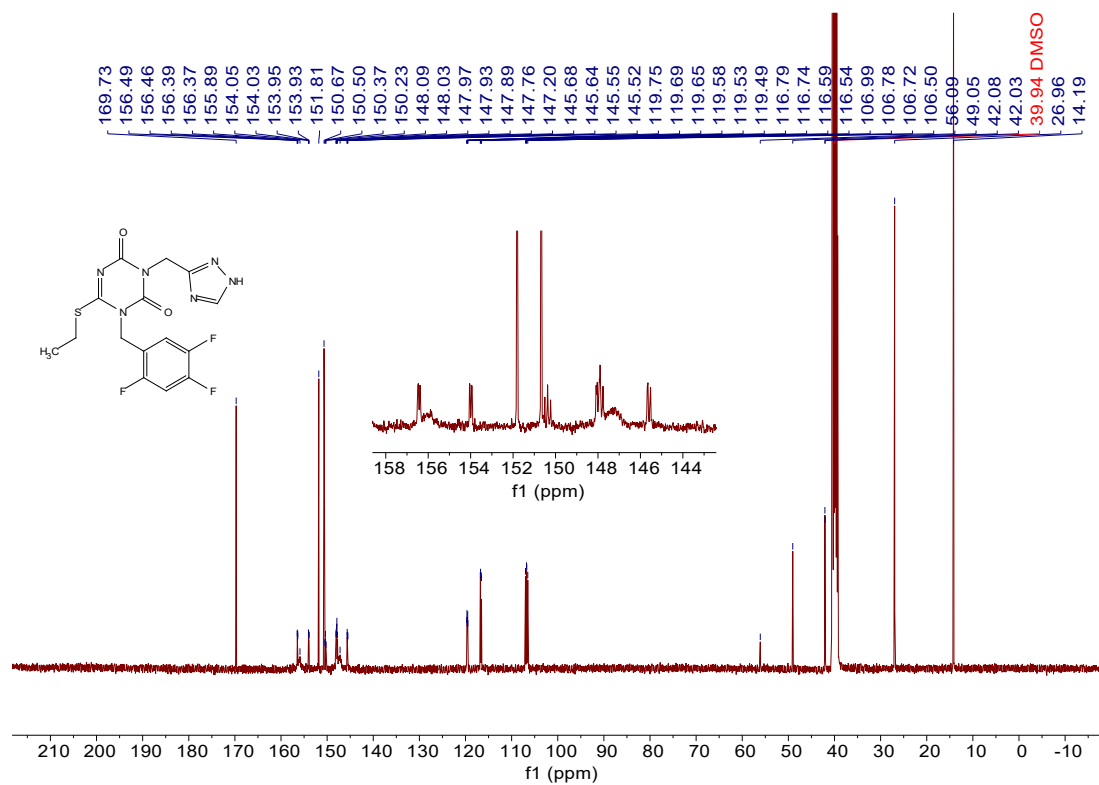

$^1\text{H}$  NMR (400 MHz) and  $^{13}\text{C}$  NMR (100 MHz) in  $\text{CDCl}_3$  of compound **4**

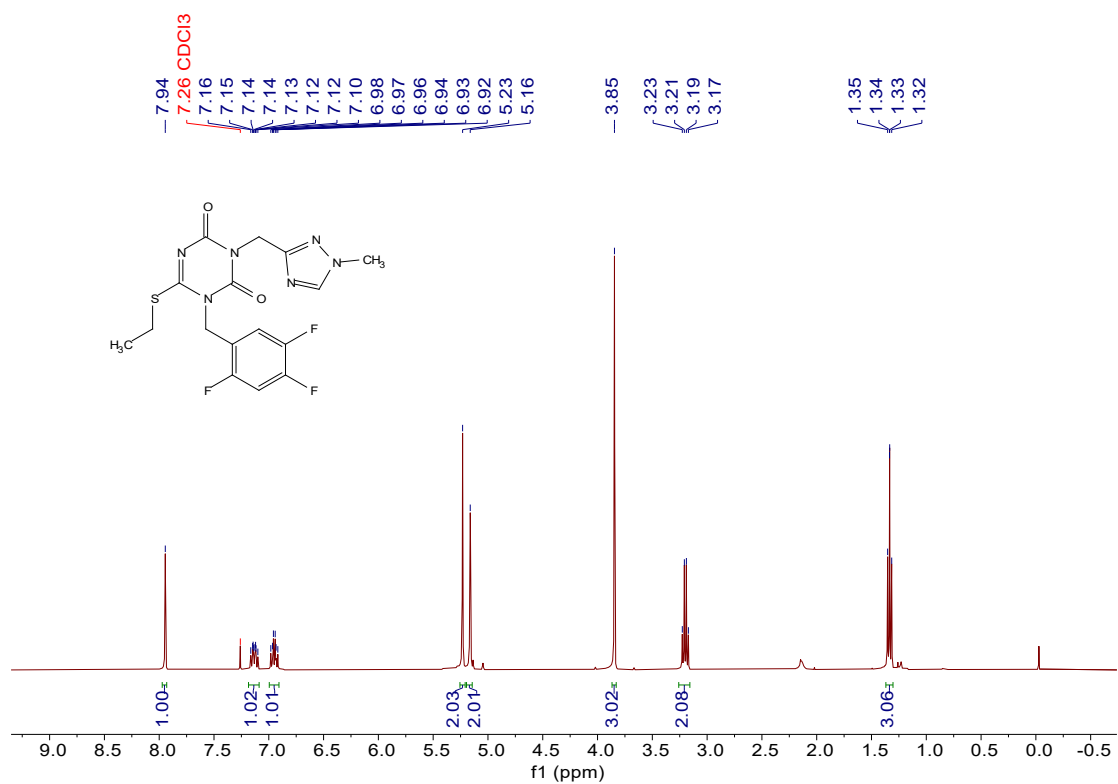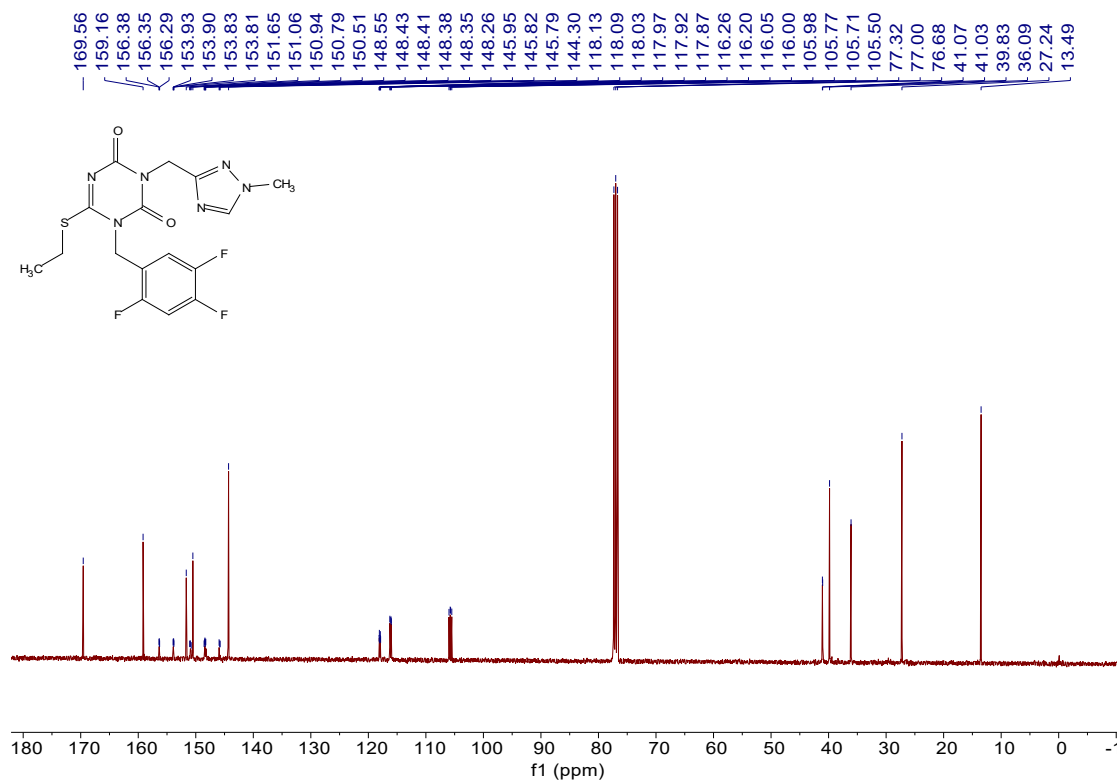

$^1\text{H}$  NMR (400 MHz) and  $^{13}\text{C}$  NMR (100 MHz) in  $\text{CDCl}_3$  of compound **9**

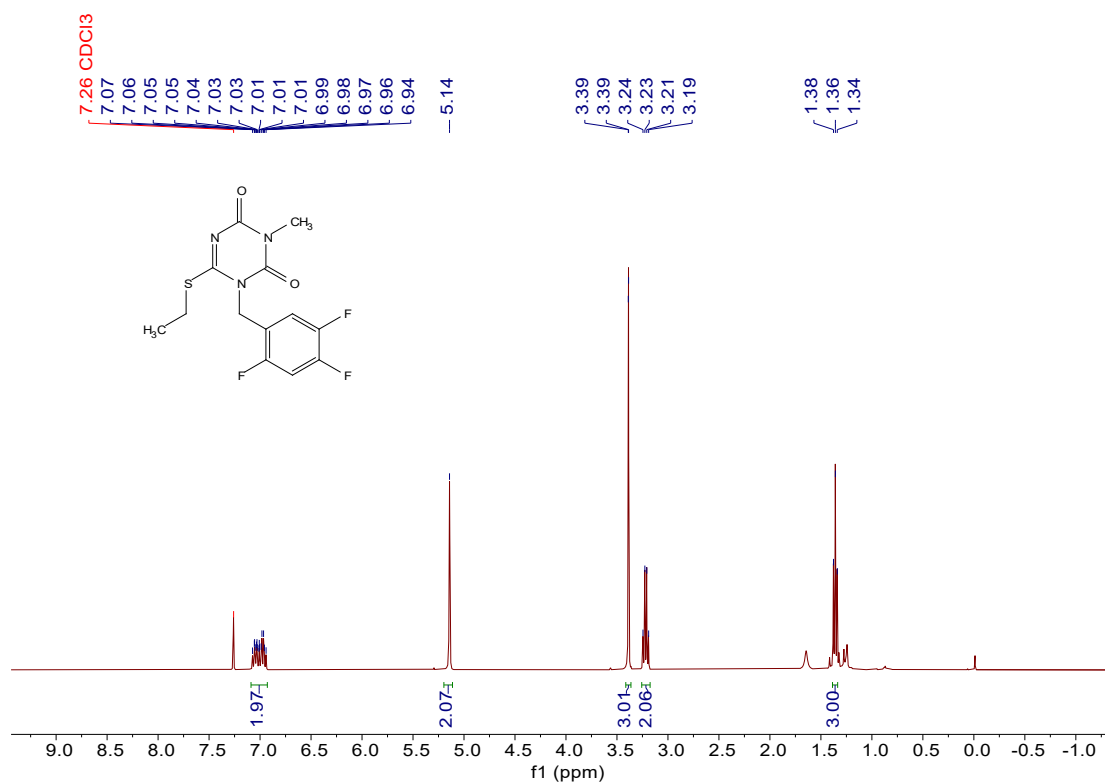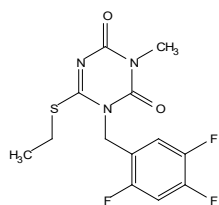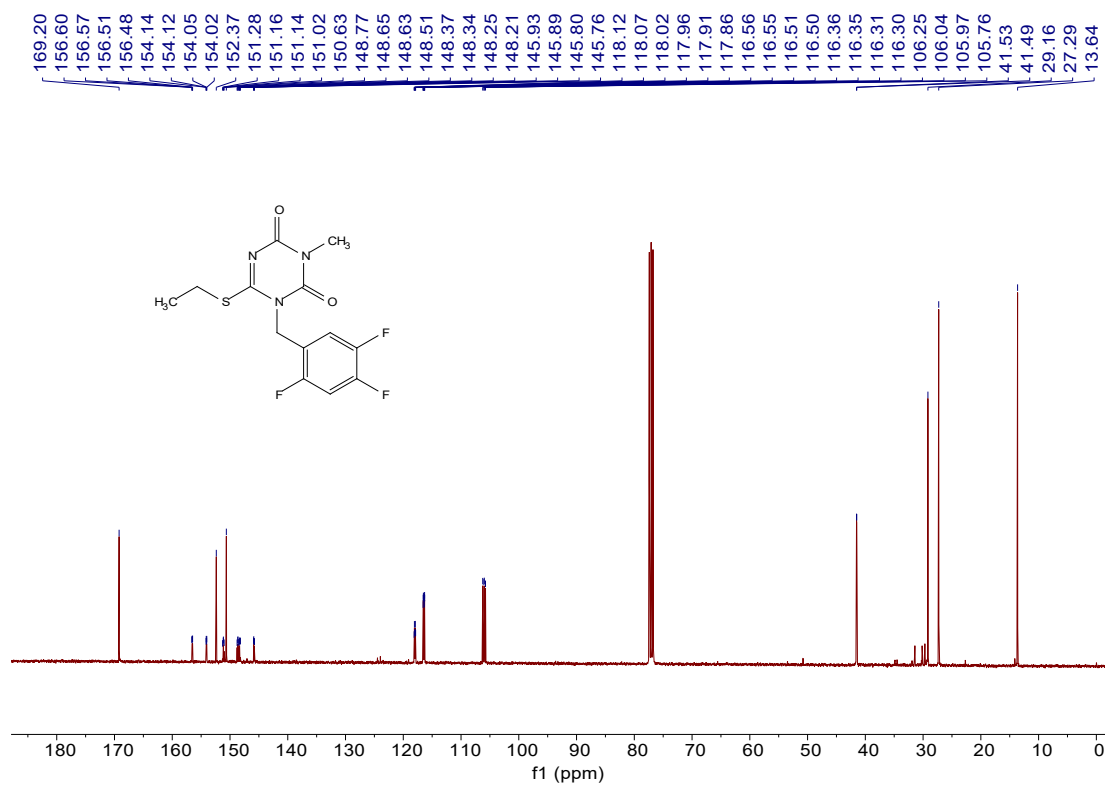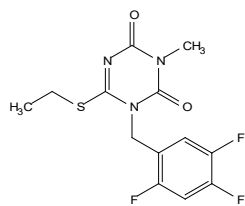

$^1\text{H}$  NMR (400 MHz) and  $^{13}\text{C}$  NMR (100 MHz) in  $\text{CDCl}_3$  of compound **10**

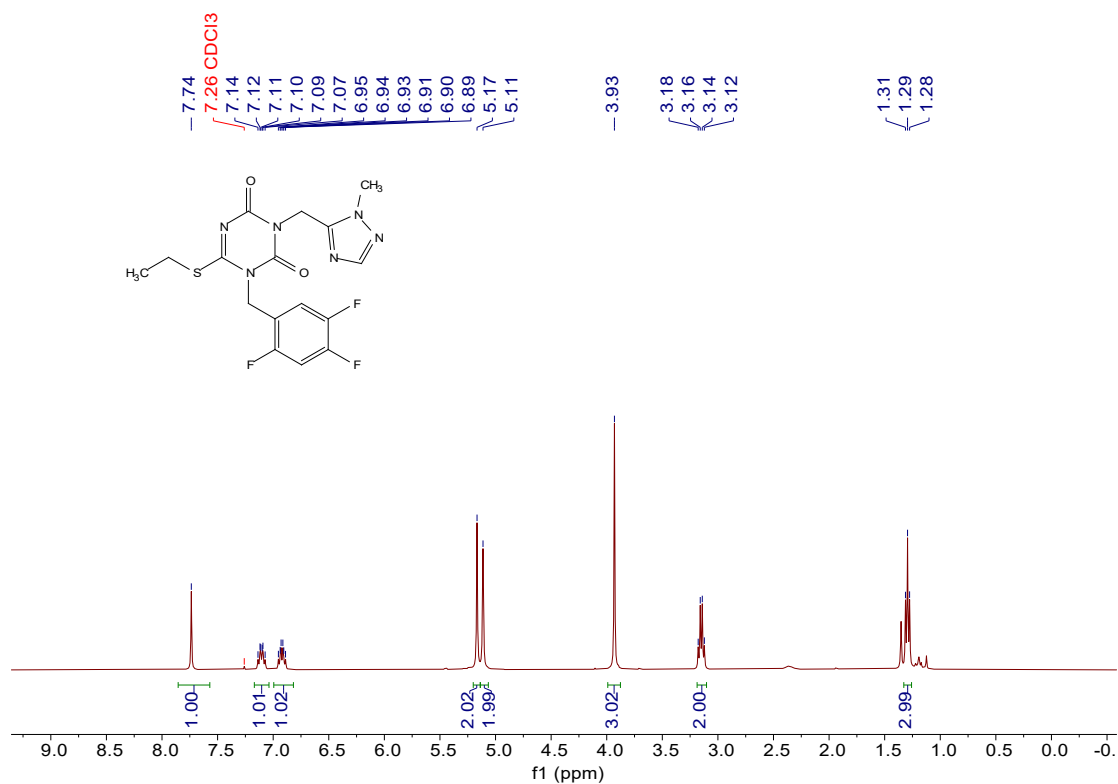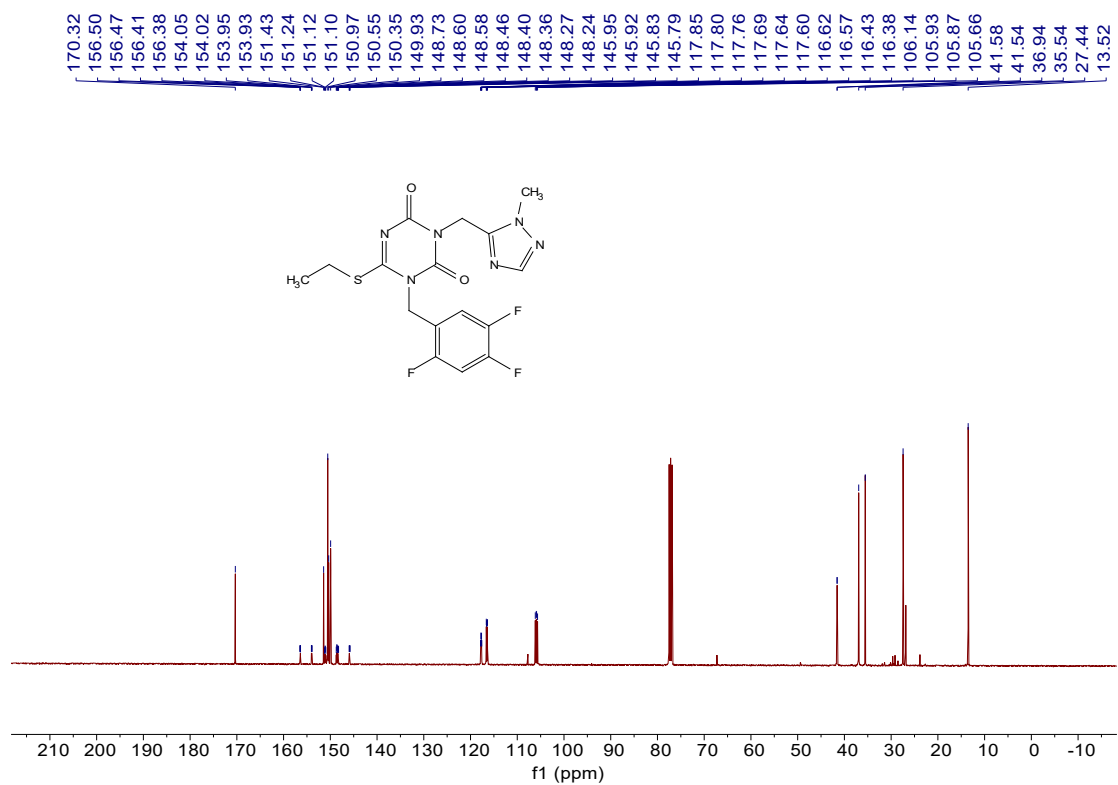

### HRMS of compound 7

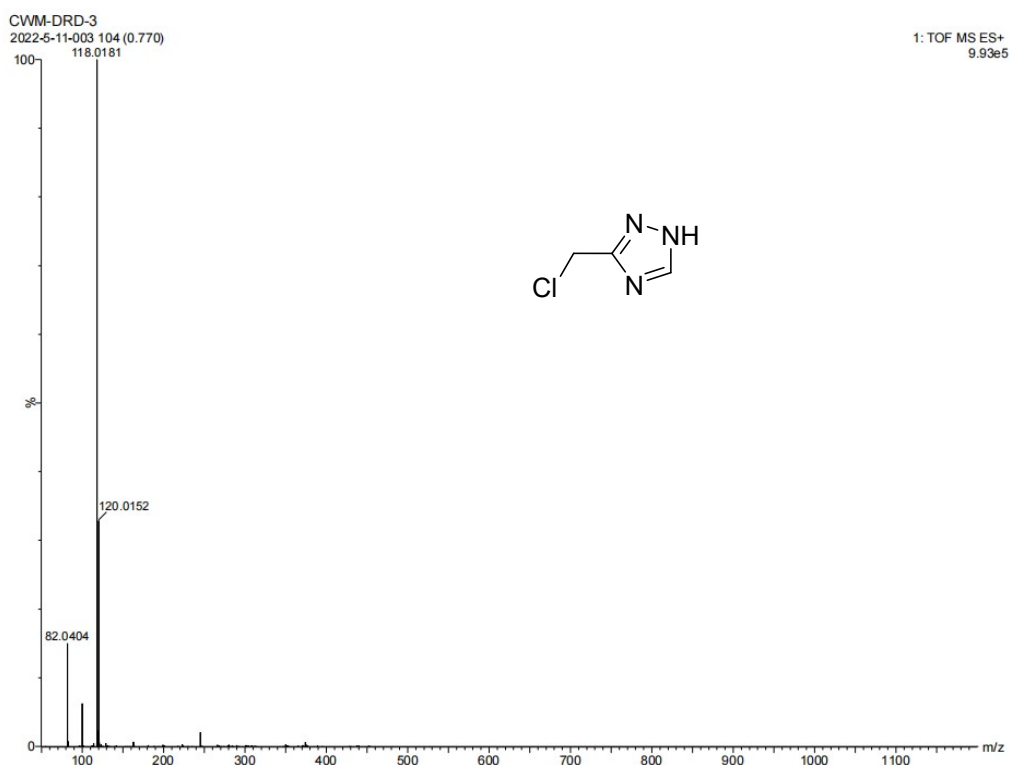

### HRMS of compound 3

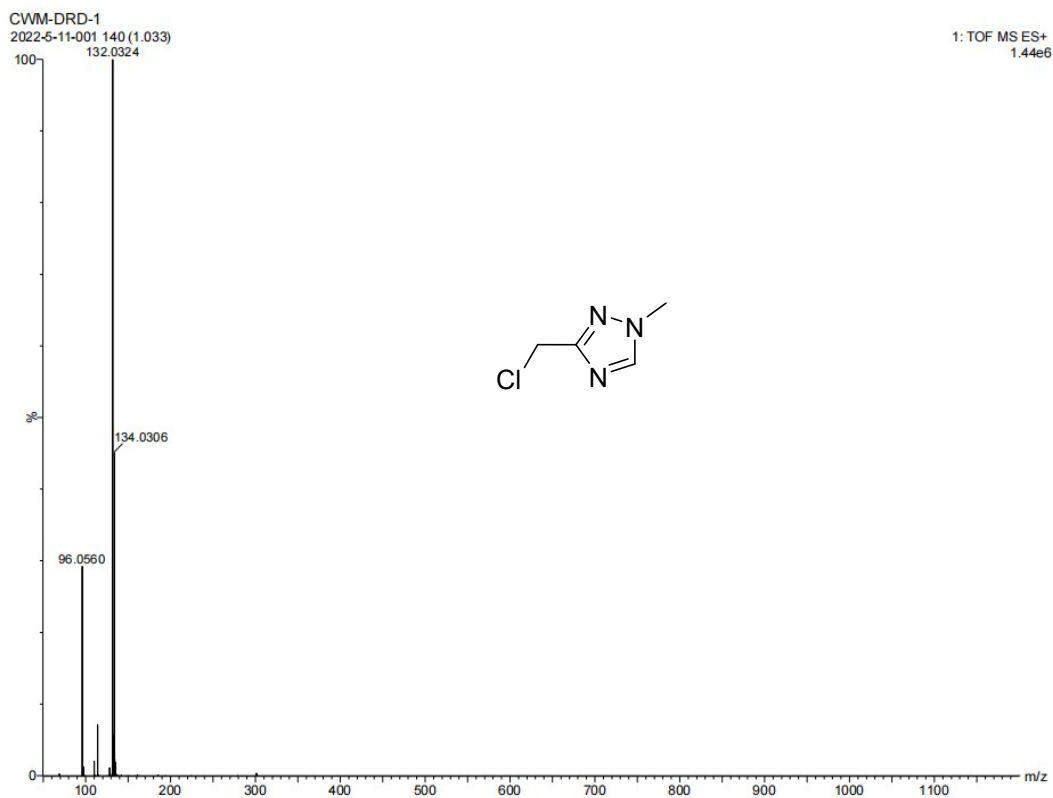



### HRMS of compound 3a

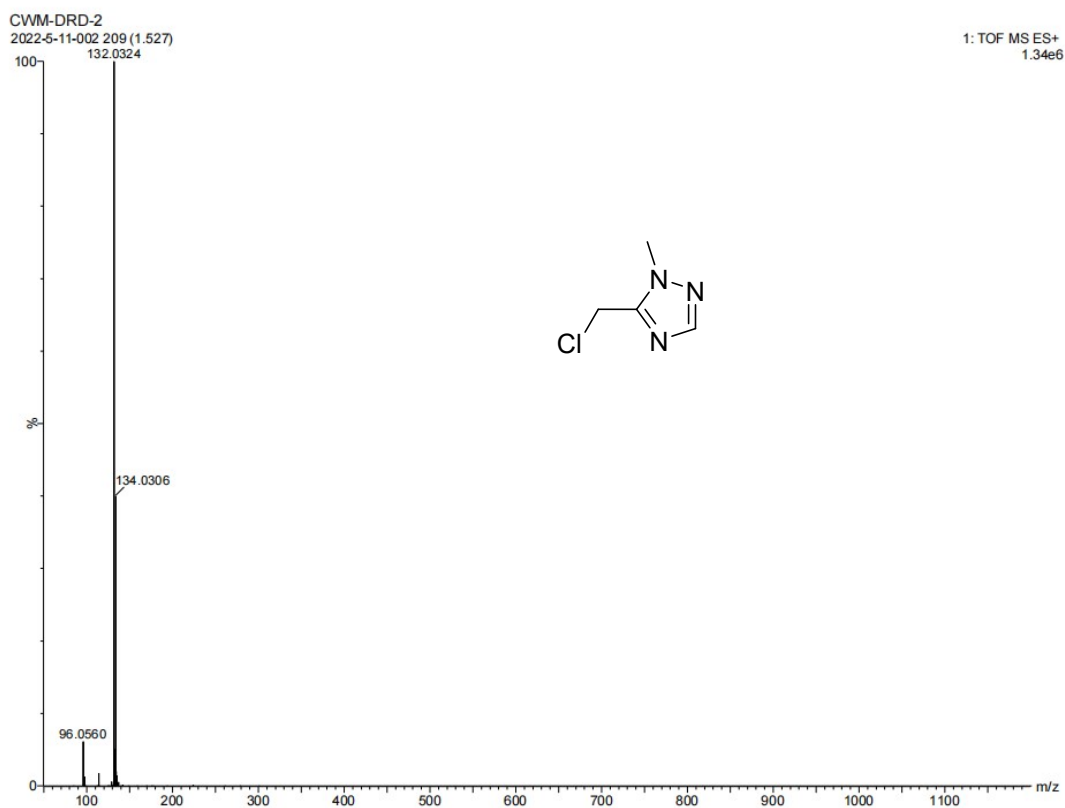

### HRMS of compound 2

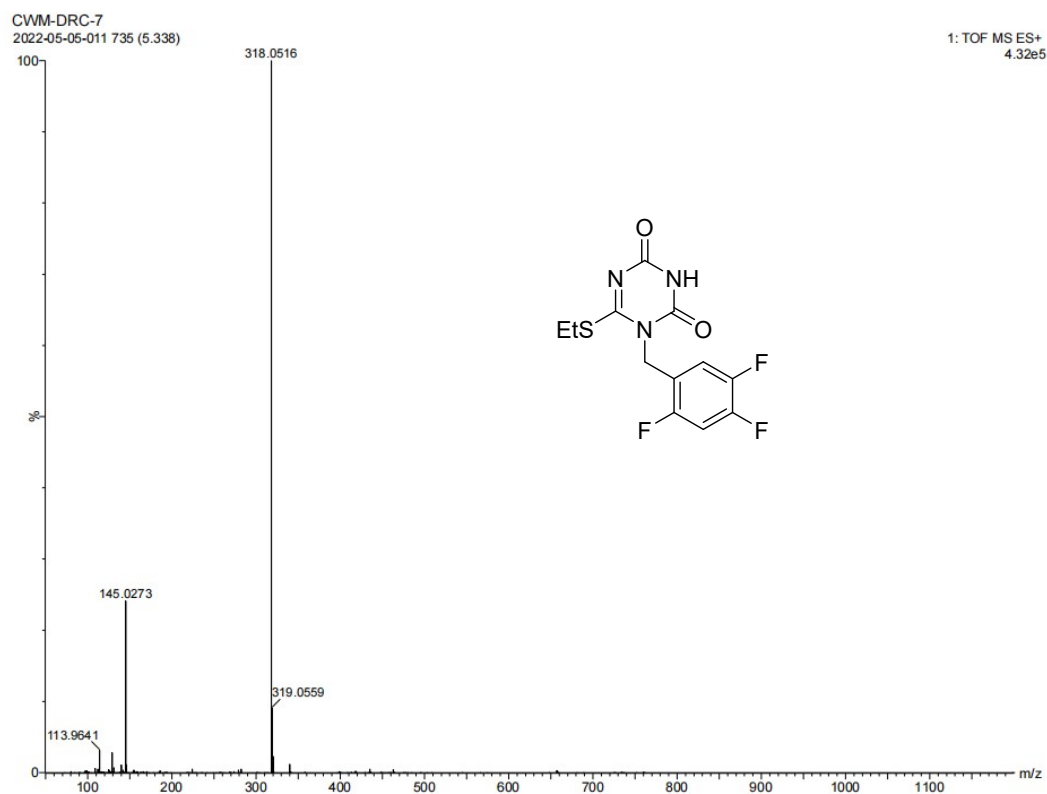

### HRMS of compound 8

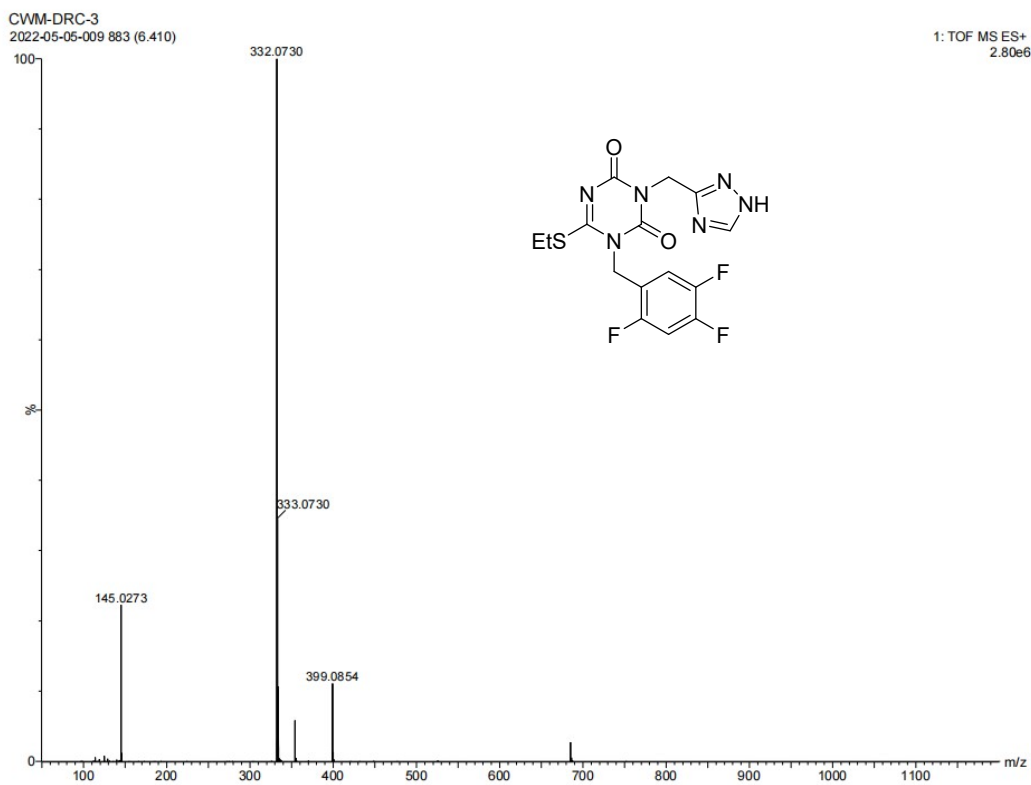

### HRMS of compound 4

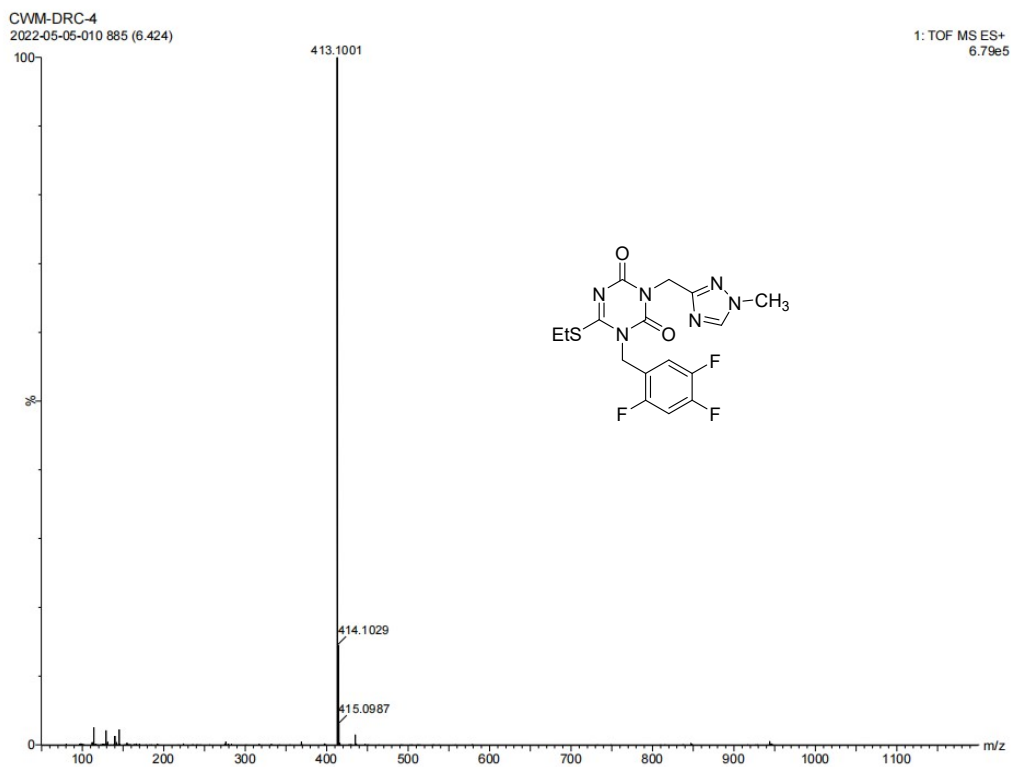

### HRMS of compound 9

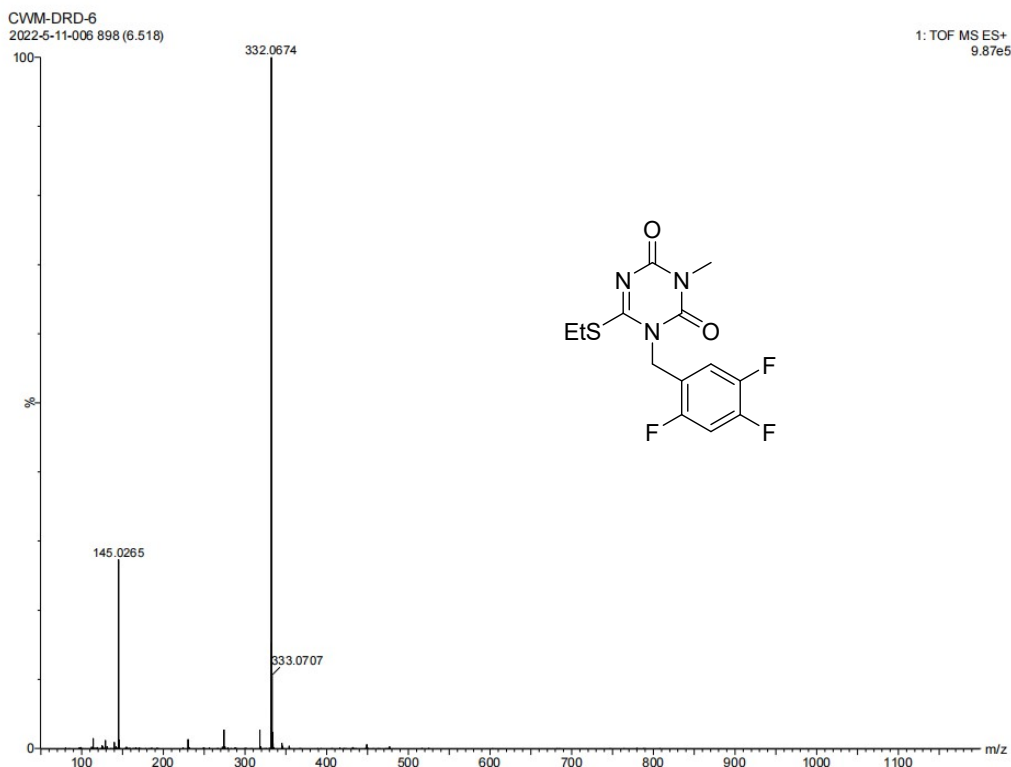

### HRMS of compound 10

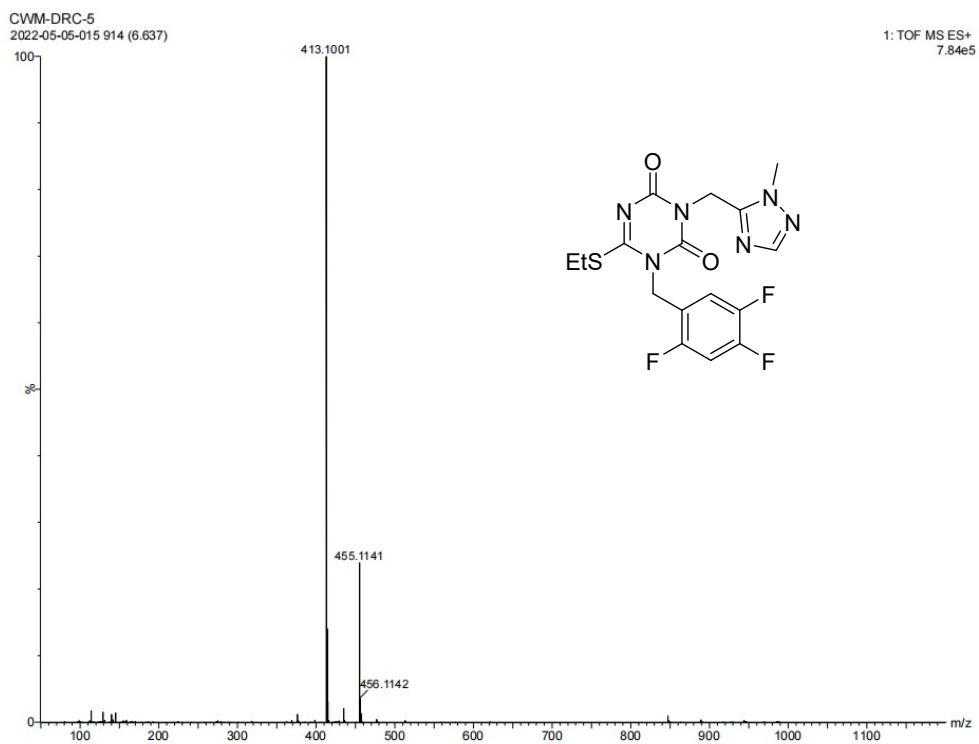

## DSC of compound 7

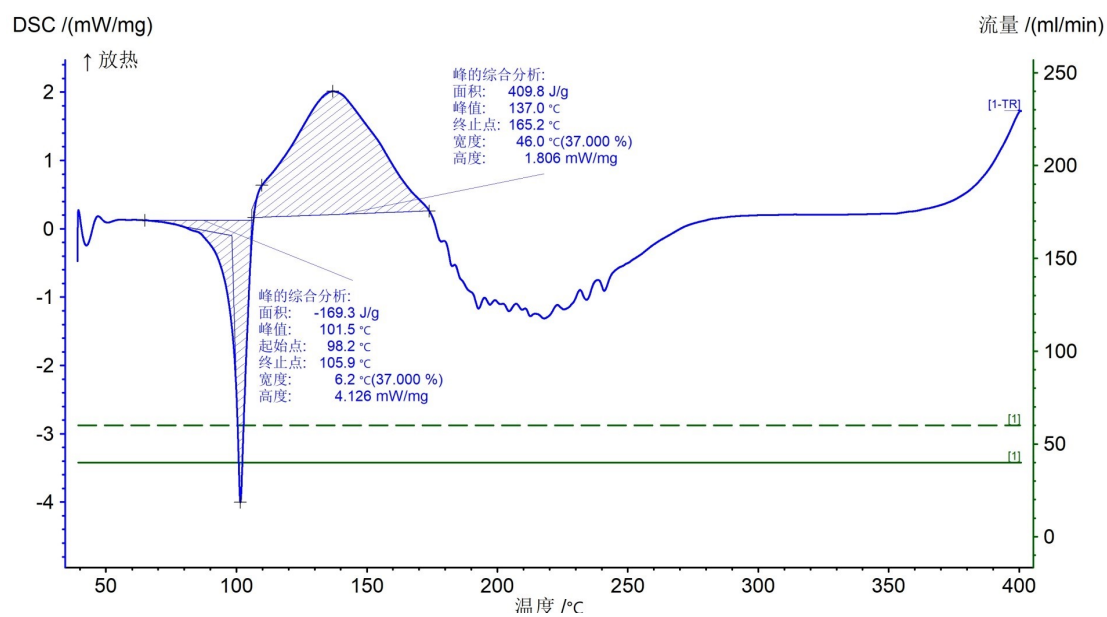

## DSC of compound 3

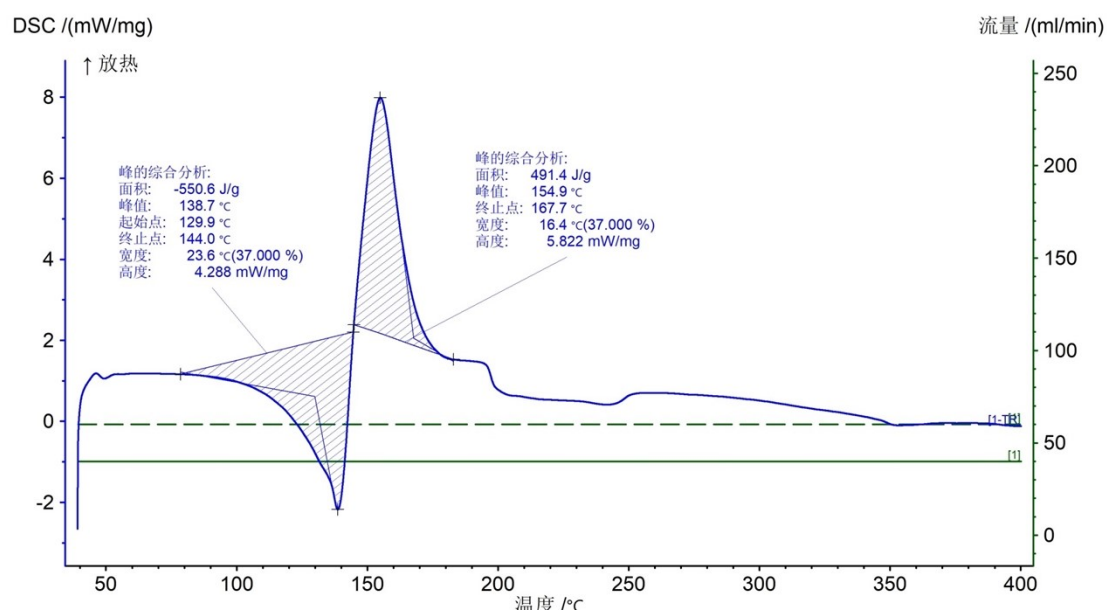

## DSC of compound 8

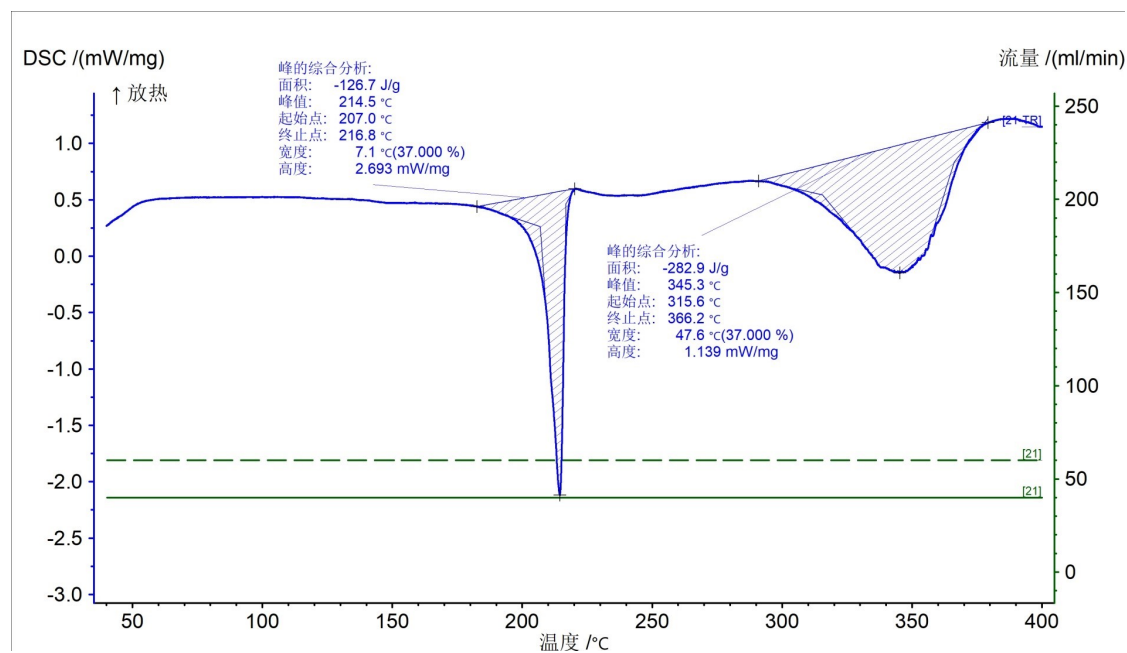

## DSC of compound 4

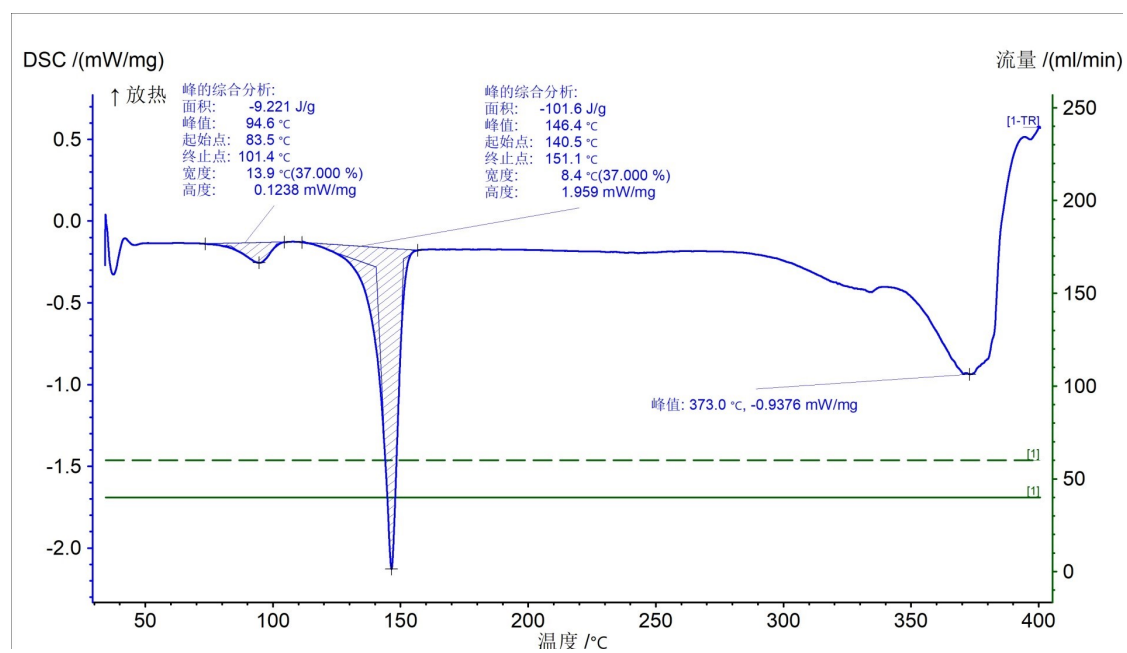

Supplement: d2ra06841a1.pdf [file d2ra06841a1.pdf]
